# Supplementary material for: Developing a Global Method for Normalizing Economic Loss from Natural Disasters
Source: Atypon-hosted journal article supplement (doi:10.1061/(asce)nh.1527-6996.0000522), 2021-11-10
Supplement: supplemental_material_nh.1527-6996.0000522_alstadt.pdf [file supplemental_material_nh.1527-6996.0000522_alstadt.pdf]

# SUPPLEMENTAL MATERIALS

*ASCE Natural Hazards Review*

## Developing a Global Method for Normalizing Economic Loss from Natural Disasters

Brian Alstadt, Anthony Hanson, and Austin Nijhuis

**DOI:** 10.1061/(ASCE)NH.1527-6996.0000522

© ASCE 2021

[www.ascelibrary.org](http://www.ascelibrary.org)

## SUPPLEMENTAL MATERIALS

**Table S1.** Measures of correlation between normalization methods and U.S. hurricane landfalls 1930-2017.

|           | All Landfalls |                      |                  | Major Landfalls |                      |                  |
|-----------|---------------|----------------------|------------------|-----------------|----------------------|------------------|
|           | Pearson's $r$ | Spearman's<br>$\rho$ | Kendall's $\tau$ | Pearson's $r$   | Spearman's<br>$\rho$ | Kendall's $\tau$ |
| AHN2<br>0 | 0.65          | 0.66                 | 0.55             | 0.74            | 0.49                 | 0.45             |
| CL18      | 0.66          | 0.67                 | 0.55             | 0.78            | 0.49                 | 0.45             |
| PL18      | 0.67          | 0.67                 | 0.56             | 0.78            | 0.48                 | 0.44             |
| PL03      | 0.67          | 0.67                 | 0.55             | 0.79            | 0.50                 | 0.45             |

Note: Major landfalls include Category 3 or greater hurricanes.
